# Supplementary material for: Estimating psychopathological networks: Be careful what you wish for
Source: PubMed Central journal article supplement (PMC5482475; doi:10.1371/journal.pone.0179891), 2017-06-23

Loglinear model (N = 10,000,000)

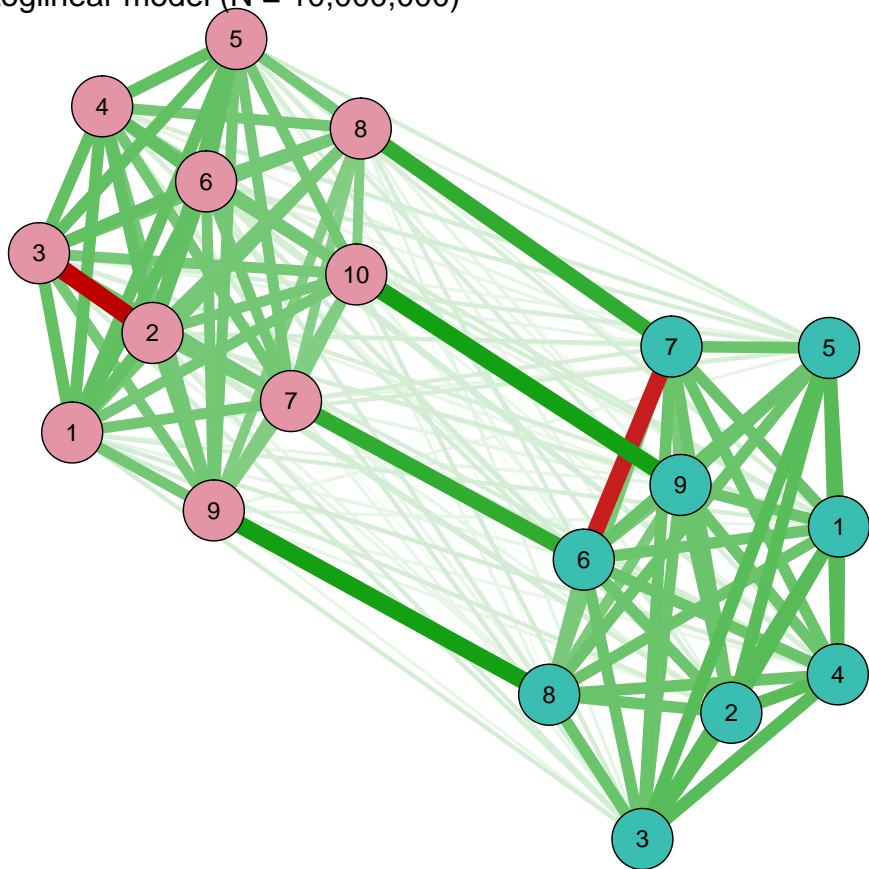

Loglinear model (N = 1,000)

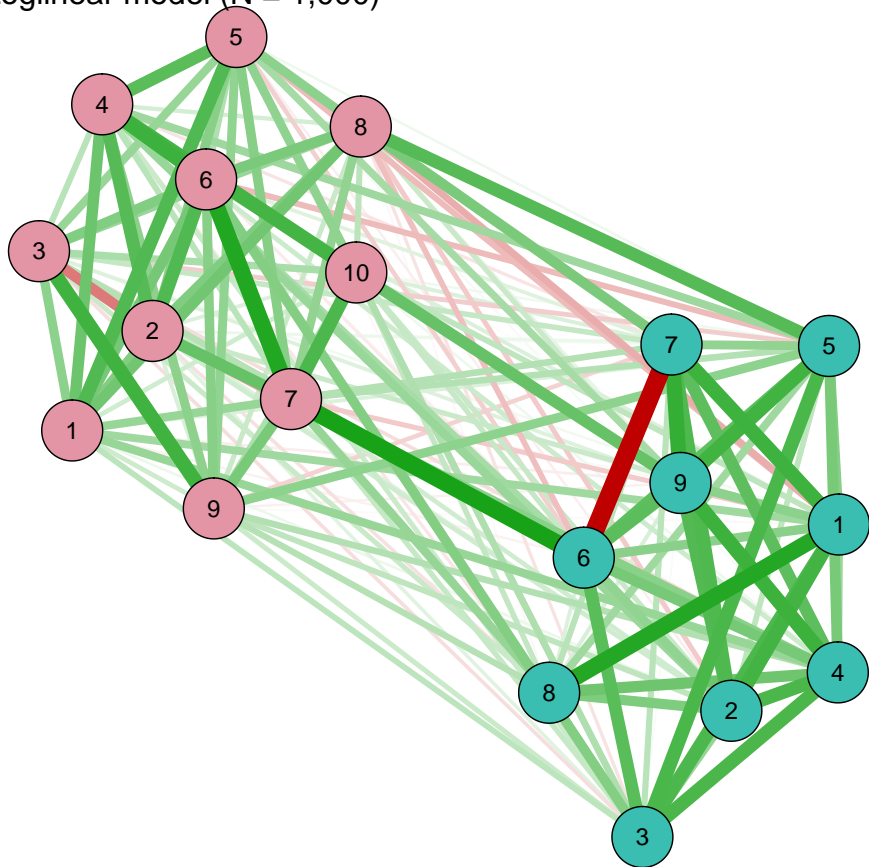

IsingFit (N = 1,000)

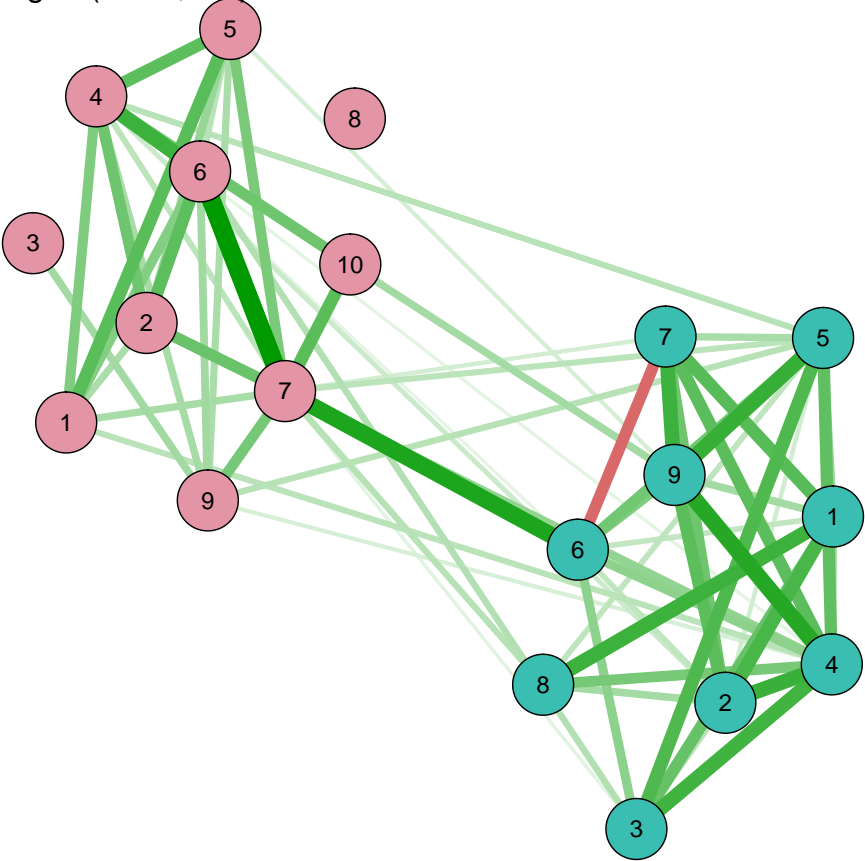

IsingFit (N = 1,000), gamma = 0.25 & AND-rule

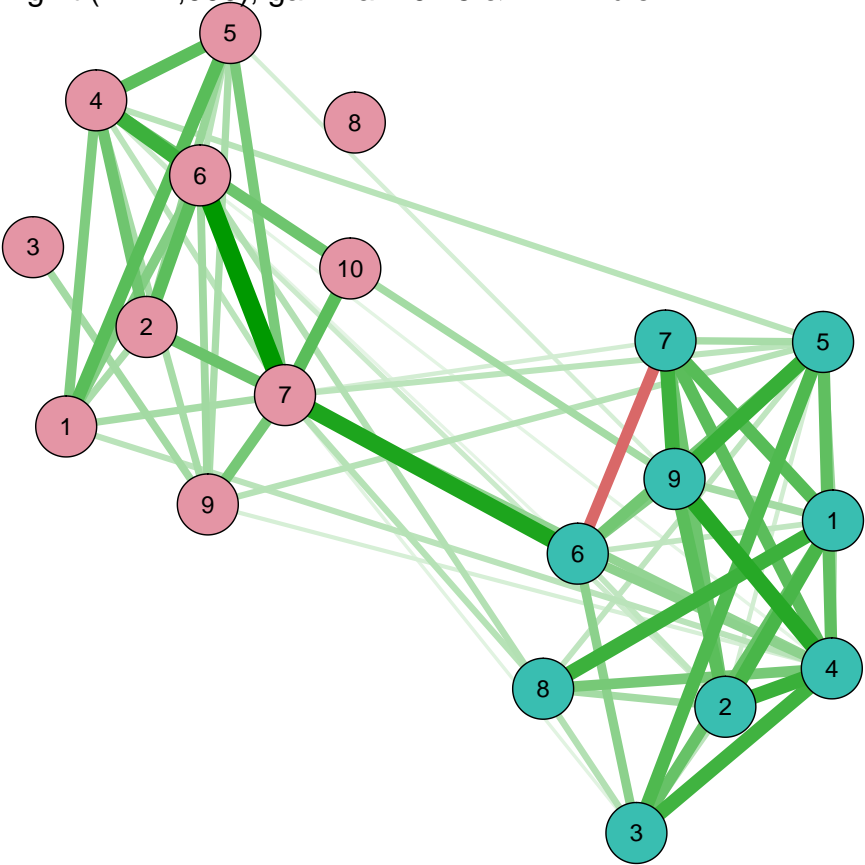

IsingFit (N = 1,000), gamma = 0.25 & OR-rule

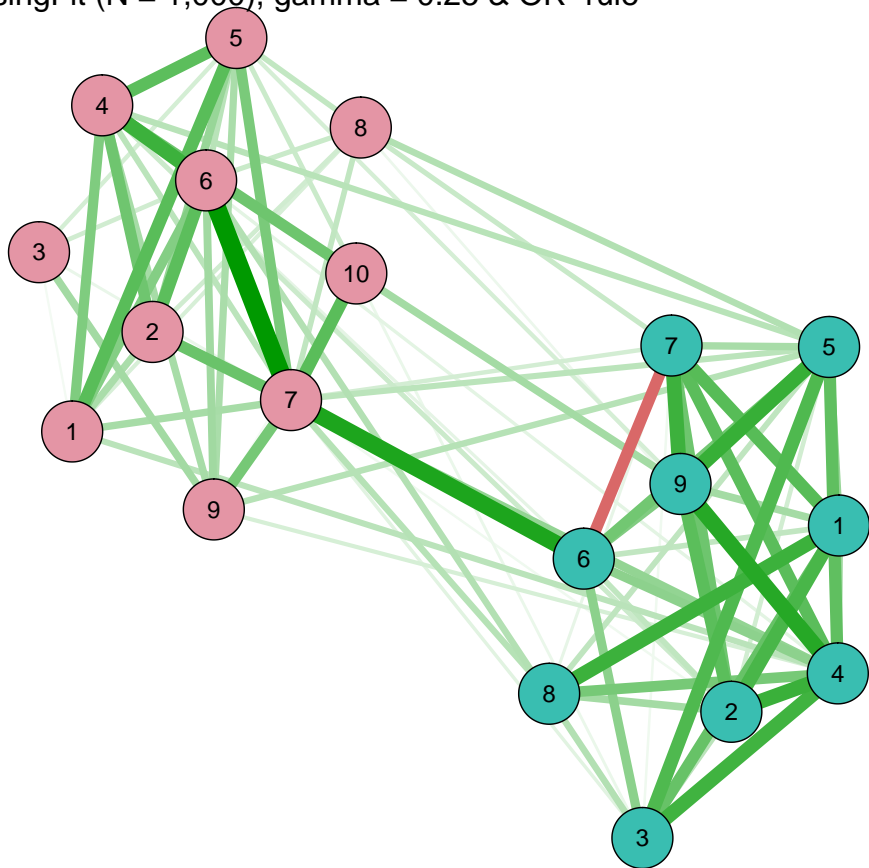

IsingFit (N = 1,000), gamma = 0 & AND-rule

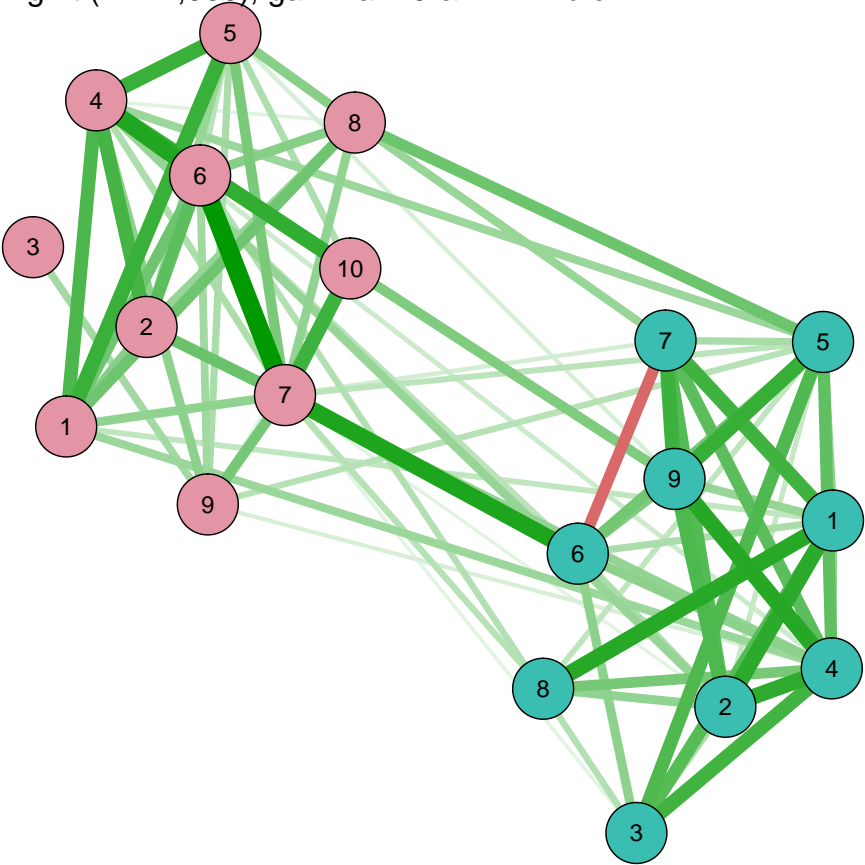

Rank 2 approximation (N = 1,000)

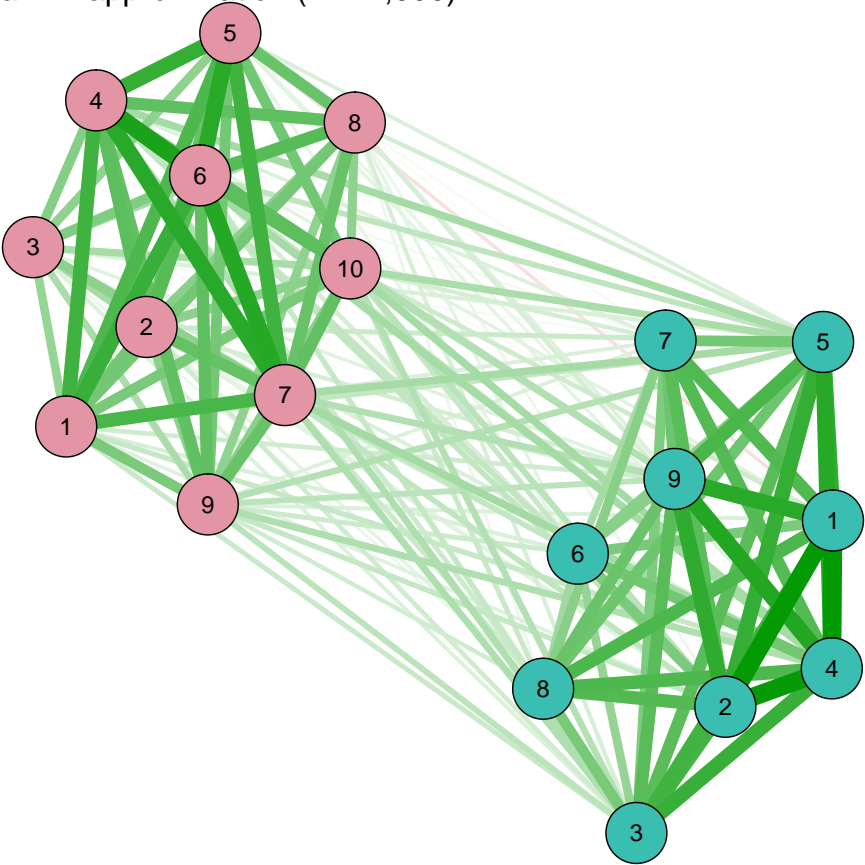

Elastic-net (N = 1,000)

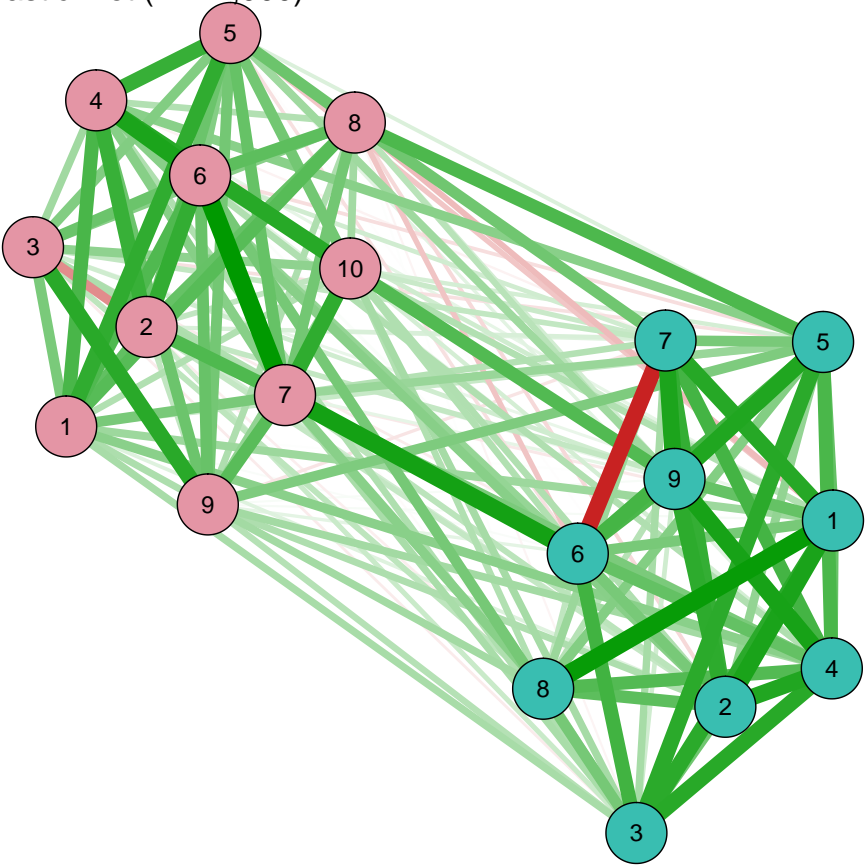



Loglinear model (N = 5,000)

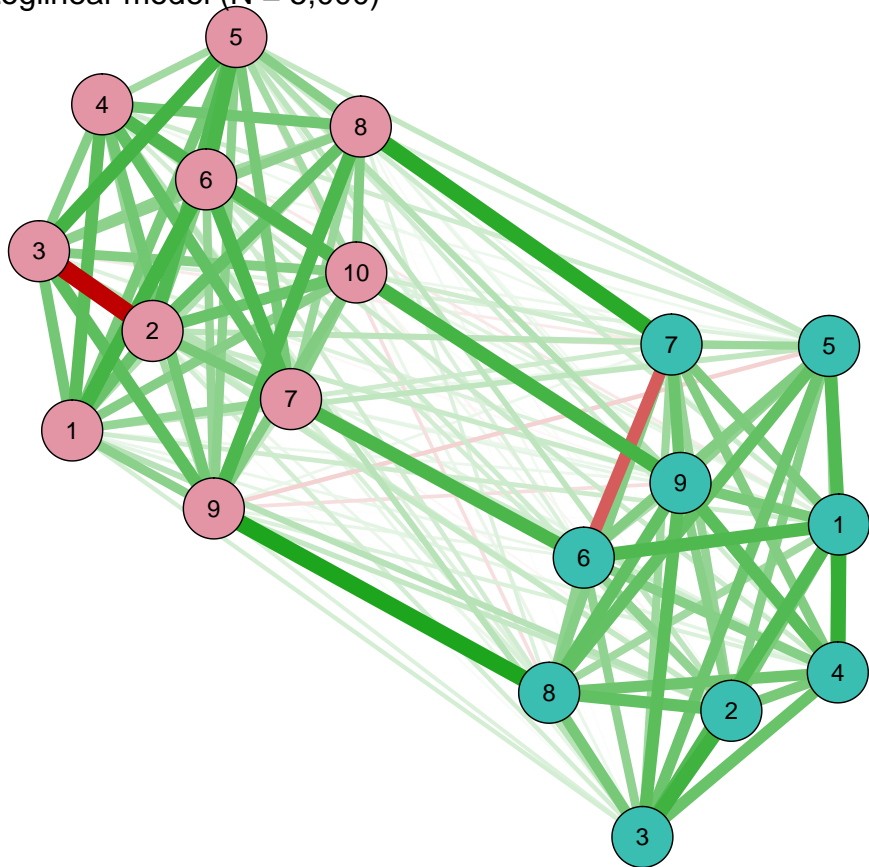

IsingFit (N = 5,000)

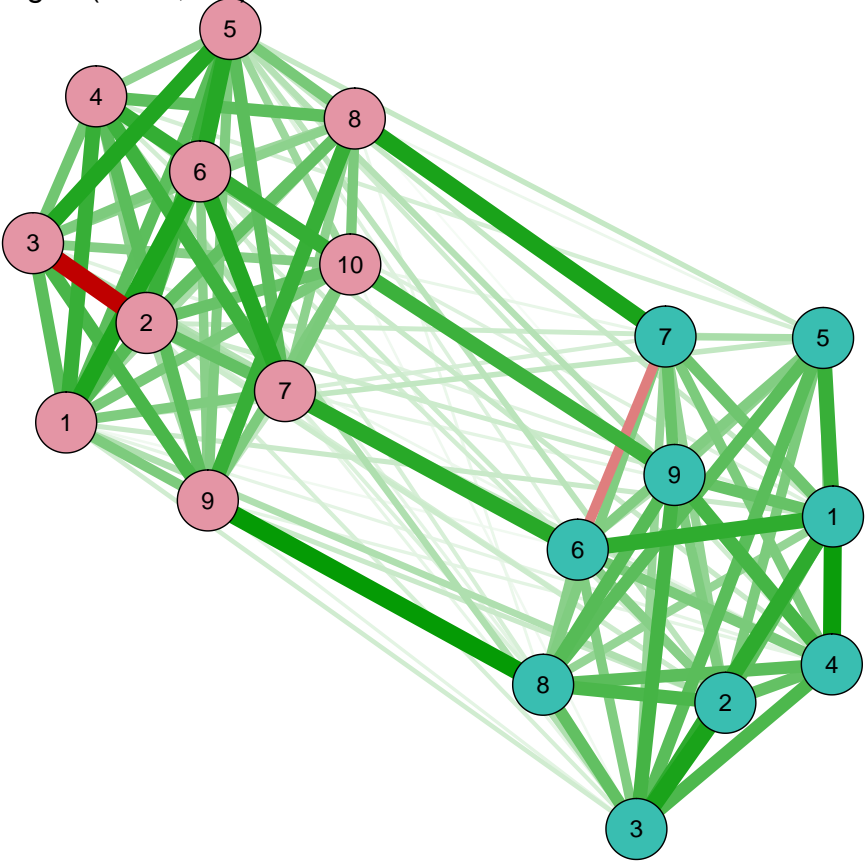

IsingFit (N = 5,000), gamma = 0.25 & AND-rule

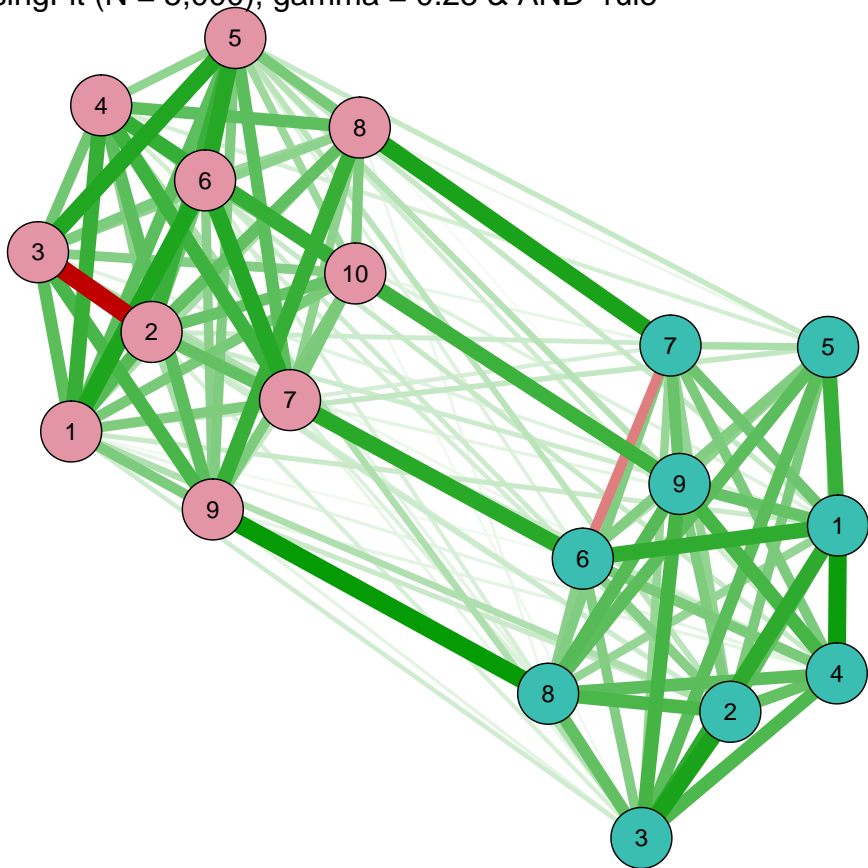

IsingFit (N = 5,000), gamma = 0.25 & OR-rule

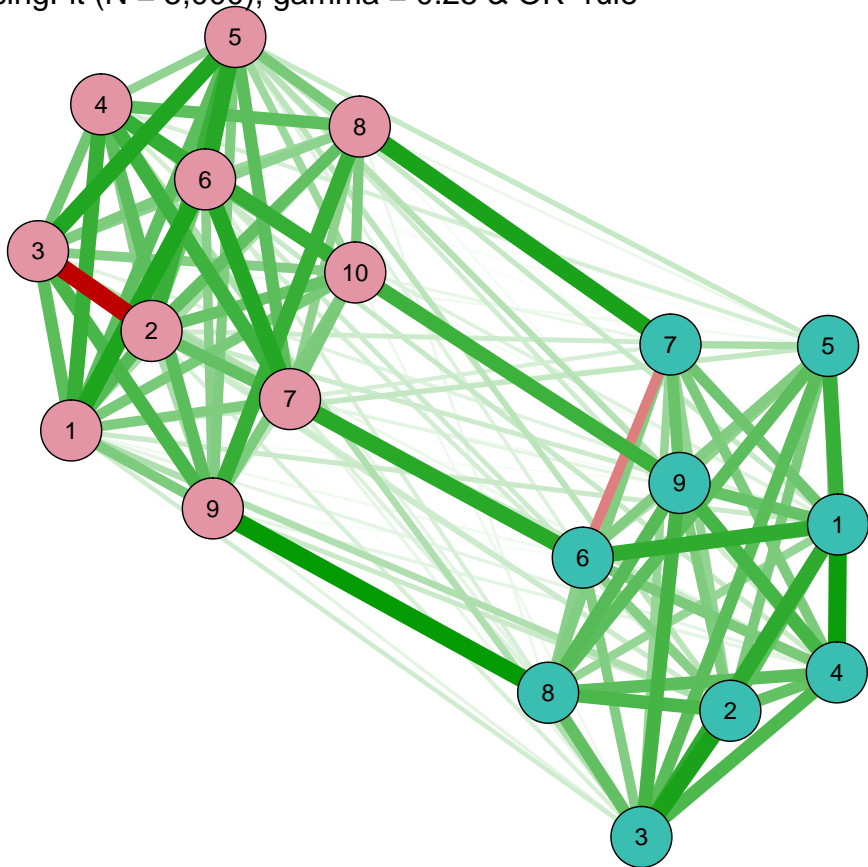

IsingFit (N = 5,000), gamma = 0 & AND-rule

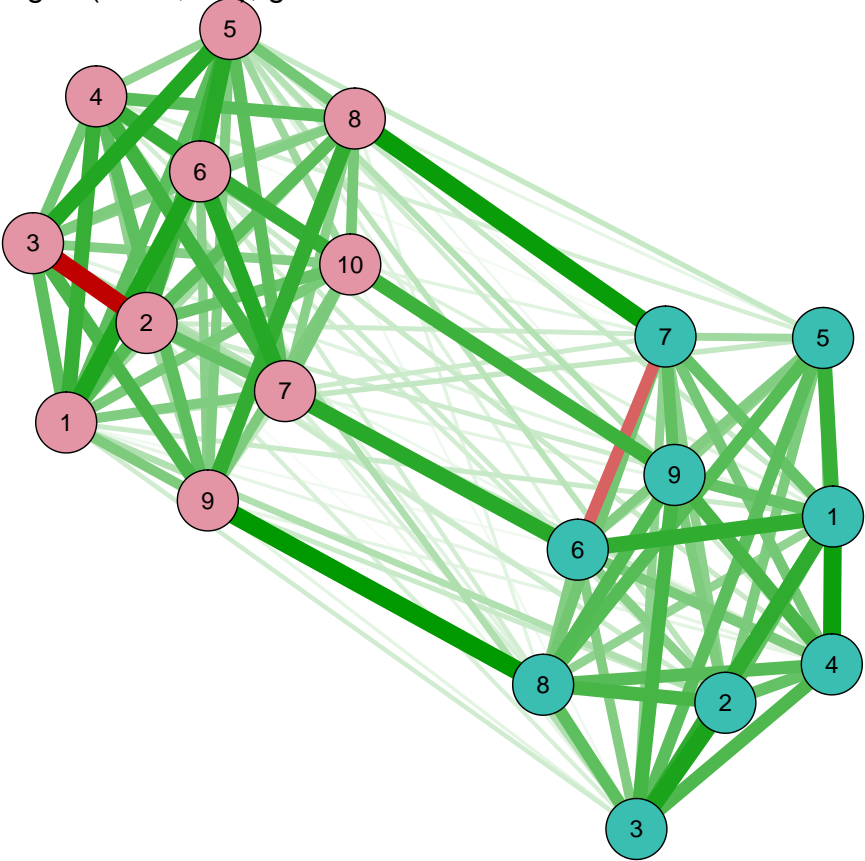

Rank 2 approximation (N = 5,000)

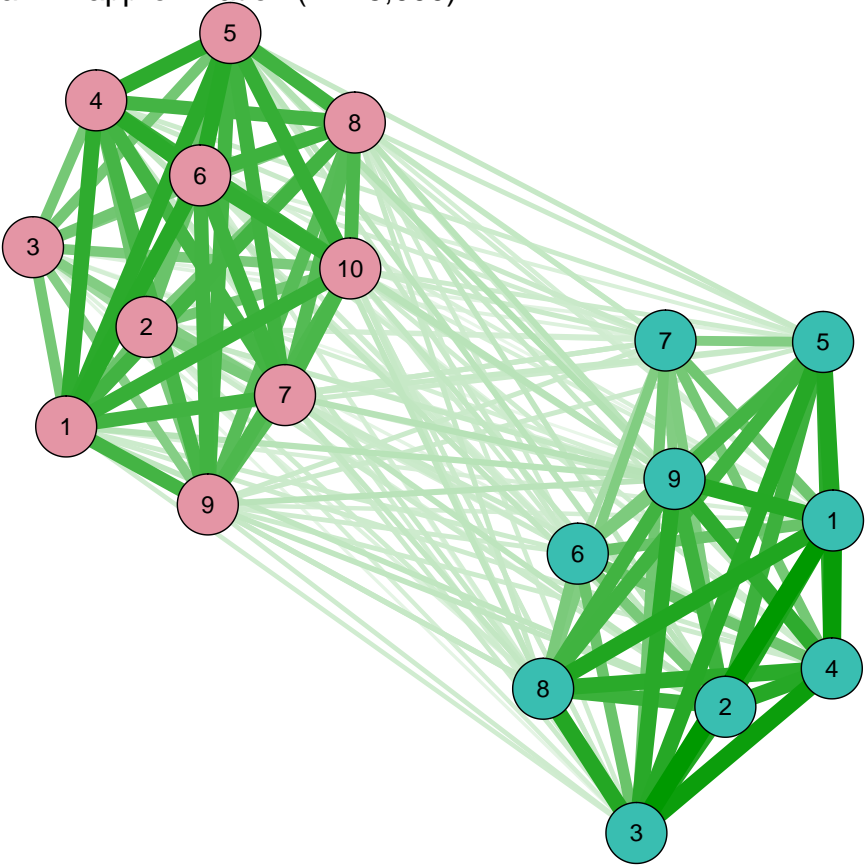

Elastic-net (N = 5,000)

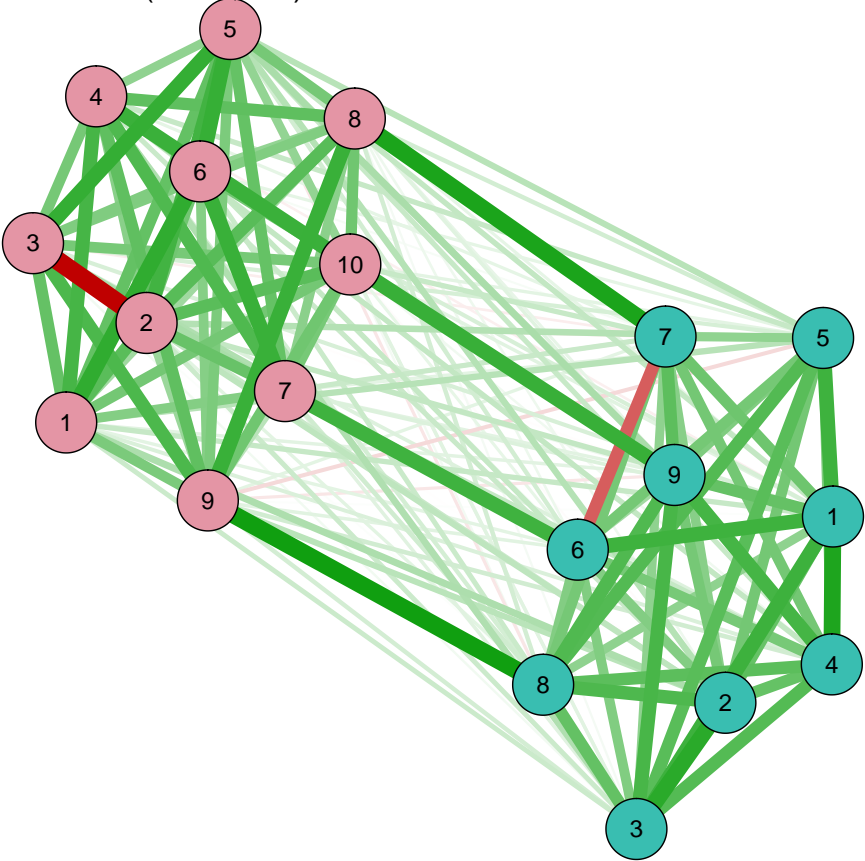

Supplement: pone.0179891.s002.pdf [file pone.0179891.s002.pdf]
